# Supplementary material for: Acute Kidney Injury in a Cohort of Critical Illness Patients Exposed to Non-Steroidal Anti-Inflammatory Drugs
Source: MDPI journal article supplement (doi:10.3390/ph15111409), 2022-11-14
Supplement: s1 [file s1]

**Table S1.** Dimensions taken into account in the construction of the algorithms

| COMORBIDITY                           | ICD-10 CODES                                                                                                                      | CUPS AND MEDICATION                                                                                                                                                                                                                                                                                                                                                                                                                                                              |
|---------------------------------------|-----------------------------------------------------------------------------------------------------------------------------------|----------------------------------------------------------------------------------------------------------------------------------------------------------------------------------------------------------------------------------------------------------------------------------------------------------------------------------------------------------------------------------------------------------------------------------------------------------------------------------|
| MYOCARDIAL INFARCTION                 | I21* I22* I252 I255                                                                                                               | 360100 360101 360102 360102 360200 360201 360202                                                                                                                                                                                                                                                                                                                                                                                                                                 |
| CONGESTIVE HEART FAILURE              | I110 I130 I132 I50* I420 I425 I429 I43*                                                                                           |                                                                                                                                                                                                                                                                                                                                                                                                                                                                                  |
| PERIPHERAL VASCULAR DISEASE           | K551 K558 K559 Z958 Z959 I70* I71* I720 I728 I739 I719 I731 I738 I771 I790 I792                                                   | 380300 380910 383903 392204 392400 392501 392502 392503 392601 392602 392603 392604 392605 380300 392620                                                                                                                                                                                                                                                                                                                                                                         |
| STROKE                                | G45* G46* I60* I69* I67* I681 I682 I688 I694 I698                                                                                 | 395010 380101 380110 380210                                                                                                                                                                                                                                                                                                                                                                                                                                                      |
| DEMENTIA                              | F00* F01* F02* F03* G30* G311 F03X F051 F010                                                                                      | *RIVASTIGMINE* *DONEPEZIL* *GALANTAMINE* *MEMANTINE* *DONEPEZIL MEMANTINE* *BUPROPION* *AMANTADINE*                                                                                                                                                                                                                                                                                                                                                                              |
| CHRONIC OBSTRUCTIVE PULMONARY DISEASE | J441 I278 I279 J4* J60* J61* J62* J63* J64* J66* J67* J684 J701 J703 J448 J449 J410 J411 J42X J431 J432 J438 J439                 | *OXYGEN*                                                                                                                                                                                                                                                                                                                                                                                                                                                                         |
| CONNECTIVE TISSUE DISEASE             | M053 M058 M059 M060 M061 M063 M069 M050 M052 M051 M353 M320 M321 M328 M329 M353 M330 M331 M332 M339 M340 M341 M342 M348 M349 M353 | *METOTREXATE* *SULFASALAZINE* *LEFLUNOMIDE* *PENICILAMINE* *RITUXIMAB* *ABATACEPT* *ETANERCEPT* *INFLIXIMAB* *ADALIMUMAB* *CERTOLIZUMAB* *GOLIMUMAB* *TOCILIZUMAB* *TOFACIAXIN* *ANAKINRA* *TACROLIMUS* *ACTEMRA*                                                                                                                                                                                                                                                                |
| PEPTIC ULCER DISEASE                  | K270 K271 K272 K273 K274 K275 K276 K279 K250 K251 K252 K253 K254 K255 K256 K257 K259 K260 K261 K262 K263 K264 K265 K266 K267 K269 | S22224 441100 451301 451600 893904 901220 906022 906023 906024 438100 440100                                                                                                                                                                                                                                                                                                                                                                                                     |
| MILD LIVER DISEASE                    | K709 K702 K703 K717 K740 K742 K746 K740 K742 K746 K743 K744 K745 K730 K731 K738 K739 k70* k73*                                    |                                                                                                                                                                                                                                                                                                                                                                                                                                                                                  |
| TYPE 2 DIABETES                       | E100 E101 E106 E108 E109 E110 E111 E116 E118 E119 E120 E121 E126 E128 E29 E130 E131 E136 E138 E139 E140 E141 E146 E148 E149 E140  | *REPAGLINIDE* *NATEGLINIDE* *LIRAGLUTIDE* *EXENATIDE* *LIXIZENATIDE* *DULAGLUTIDE* *ACARBOSE* *MIGLITOL* *CLORPROPAMIDE* *TOLBUTAMIDE* *GLIBENCLAMIDE* *GLIMEPIRIDE* *GLICLAZIDE* *GLIBENS* *GLIPIZIDE* *INSULIN* *INSUMAN* *INSULEX* *INSULIN ASPART* *INSULIN GLULISINE* *INSULIN LISPRO* *INSULIN DETEMIR* *INSULIN GLARGINE* *INSULIN DEGLUDEC* *INSULIN NPH* *METFORMIN* *GEMIGLIPTIN* *EMPAGLIFLOZIN* *PHENFORMIN* *SITAGLIPTIN* *VILDAGLIPTIN* *LINAGLIPTIN* *ALOGLIPTIN* |
| PARAPLEGIA - HEMIPLEGIA               | G81 G041 G820 G821 G822                                                                                                           |                                                                                                                                                                                                                                                                                                                                                                                                                                                                                  |
| CHRONIC KIDNEY DISEASE                | I120 I131 N03* N05* Z49* N18 N19 N25 N01 N074 N073 N072 N52 N19 N250 Z940 Z992                                                    | 389500 394300 399501 549002 392701 392702 394200 549001 549012 549800 549801 549802 S22220 S22223 549800                                                                                                                                                                                                                                                                                                                                                                         |
| DIABETES MELLITUS WITH COMPLICATIONS  | E10* E11* E12* E13* E14* H360 H280 G590 G632 M142                                                                                 |                                                                                                                                                                                                                                                                                                                                                                                                                                                                                  |

|                                                                                   |                                                                                                                                                                                                                                                                                                                                                                                                                                                                                                                                                                                                                                                                            |
|-----------------------------------------------------------------------------------|----------------------------------------------------------------------------------------------------------------------------------------------------------------------------------------------------------------------------------------------------------------------------------------------------------------------------------------------------------------------------------------------------------------------------------------------------------------------------------------------------------------------------------------------------------------------------------------------------------------------------------------------------------------------------|
| ANY TUMOR INCLUDING<br>LEUKEMIA/LYMPHOMA<br>(WITHOUT MALIGNANT<br>SKIN NEOPLASIA) | C000 C001 C002 C003 C004 C005 C006<br>C007 C008 C009 C01X C020 C021 C022<br>C023 C024 C029 C030 C031 C039 C040<br>C041 C049 C050 C051 C052 C059 C060<br>C061 C062 C069 C07X C080 C081 C089<br>C090 C091 C099 C101 C102 C103 C104<br>C883 C887 C889 C900 C901 C91* C92*<br>C93* C94* C95* C96*                                                                                                                                                                                                                                                                                                                                                                              |
| SEVERE LIVER DISEASE                                                              | K729 K766 K703 K767 K721                                                                                                                                                                                                                                                                                                                                                                                                                                                                                                                                                                                                                                                   |
| METASTATIC SOLID<br>TUMOUR                                                        | C780 C7* C8* C781 C782 C783 C784<br>C785 C786 C787 C788 C79 C790 C791<br>C792 C793 C794 C795 C796 C797 C798                                                                                                                                                                                                                                                                                                                                                                                                                                                                                                                                                                |
| HIV                                                                               | Z114 Z21X B200 B201 B202 B203 B204<br>B205 B206 B207 B208 B209<br>B210 B211 B212 B217 B219 B220 F028<br>R75X B220 B221 B24*<br>*ZIDOVUDINE* *LAMIVUDINE* *TENOFVIR*<br>*EMTRICITABIN* *DIDANOSINE* *NEVIRAPINE*<br>*EFAVIRENZ* *ETRAVIRINE* *SAQUINAVIR* *LOPINAVIR*<br>*ATAZANAVIR* *INDINAVIR* *NELFINAVIR*<br>*RALTEGRAVIR* *ABACAVIR* *ABAMUNE* *RITONAVIR*<br>*ATAZANAVIR*                                                                                                                                                                                                                                                                                            |
| NSAIDs                                                                            | *DIFLUCINAL* *SULPARIDINA* *ANTIPIRINA*<br>*FENASONA* *AMINOPIRINA* *DIPIRONA*<br>*FENILBUTAZONA* *OXIFENBUTAZONA*<br>*PIRAZINOBUTAZONA* *FEPRAZONA* *CLOFENAZONA*<br>*BUMADIZONA* *SUXIBUZONA* *AZAPROPAZONA*<br>*BENZIDAMINA* *SULINDAC* *DICLOFENAC*<br>*ACECLOFENAC* *METIAZINICO* *ISONIXINA*<br>*OXAPROXIN* *NIMESULIDA* *NEFOPAM*<br>*ETODOLACO* *PIRROLACÉTICO* *KETOROLACO*<br>*FENILACÉTICO* *DICLOFENACO* *IBUPROFEN*<br>*KETOPROFEN* *NAPROXEN* *PIROXICAM*<br>*TENOXICAM* *INDOLACÉTICO* *MEFENÁMICO*<br>*PIRAZOLÓNICOS* *METAMIZOL* *CELECOXIB*<br>*ROBECOXIB* *PARECOXIB* *ALDECOXIB*<br>*ETORICOXIB* *NABUMETONA* *LUMIRACOXIB*<br>*MELOXICAM* *CELECOXIB* |
| PNEUMONIA                                                                         | J851 A403 J120 J128 J13X F060 J14X<br>J150 J151 J152 J153 J154 J155 J156<br>J157 J158 J156 J159 J160 J168 J170<br>J171 J172 J180 J188 J189 B960                                                                                                                                                                                                                                                                                                                                                                                                                                                                                                                            |

**Table S2.** Adjusted odds ratios of AKI with RRT for patients using NSAIDs

| Independent variable                   | OR (95%CI)         | P value |
|----------------------------------------|--------------------|---------|
| NSAID                                  | 1.25 (1.12 - 1.40) | 0.001   |
| Male sex                               | 1.54 (1.41 - 1.68) | 0.001   |
| Age group -----no. (%)                 |                    |         |
| 40-49 yr.                              | 1.23 (0.96 - 1.58) | 0.101   |
| 50-59 yr.                              | 1.20 (0.97 - 1.49) | 0.092   |
| 60-69 yr.                              | 1.44 (1.17 - 1.76) | 0.001   |
| 70-79 yr.                              | 1.76 (1.44 - 2.16) | 0.001   |
| >= 80 yr.                              | 1.74 (1.41 - 2.14) | 0.001   |
| <b>ICU admission</b>                   |                    |         |
| Trauma                                 | 0.77 (0.64 - 0.92) | 0.005   |
| Sepsis                                 | 2.99 (2.70- 3.32)  | 0.001   |
| Myocardial infarction                  | 0.79 (0.70- 0.89)  | 0.001   |
| Congestive heart failure               | 1.90 (1.58 - 2.28) | 0.001   |
| Contrast medium                        | 1.44 (0.92 - 2.25) | 0.106   |
| <b>Coexisting conditions __ no (%)</b> |                    |         |
| Hypertension                           | 1.94 (1.69 - 2.24) | 0.001   |
| Diabetes                               | 1.99 (1.82 - 2.17) | 0.001   |
| Cerebrovascular disease                | 0.91 (0.77 - 1.07) | 0.260   |
| Chronic pulmonary disease              | 0.55 (0.50 - 0.61) | 0.001   |
| Connective tissue disease              | 0.79 (0.66 - 0.95) | 0.011   |
| Peptic ulcer disease                   | 0.71 (0.61- 0.82)  | 0.001   |
| Liver disease                          | 2.28 (1.71 - 3.03) | 0.001   |
| Cancer                                 | 1.29 (0.99 - 1.66) | 0.050   |

**Table S3.** Adjusted odds ratios of pneumonia for patients using NSAIDs

| Independent variable                   | OR C.I (95%)          | P value |
|----------------------------------------|-----------------------|---------|
| NSAID                                  | 1.10 (1.00 - 1.20)    | 0.043   |
| Male sex                               | 1.17 (1.08 - 1.26)    | 0.001   |
| Age group -----no. (%)                 |                       |         |
| 40-49 yr.                              | 1.04 (0.87 - 1.25)    | 0.635   |
| 50-59 yr.                              | 0.91 (0.78 - 1.07)    | 0.262   |
| 60-69 yr.                              | 0.80 (0.68 - 0.93)    | 0.005   |
| 70-79 yr.                              | 1.05 (0.90 - 1.21)    | 0.560   |
| >= 80 yr.                              | 1.66 (1.42-1.92)      | 0.001   |
| <b>ICU admission</b>                   |                       |         |
| Trauma                                 | 0.82 (0.72 - 0.94)    | 0.005   |
| Sepsis                                 | 37.00 (34.26 - 39.95) | 0.001   |
| Myocardial infarction                  | 0.76 (0.68 - 0.85)    | 0.001   |
| Congestive heart failure               | 1.24 (1.02 - 1.50)    | 0.001   |
| Contrast medium                        | 0.69 (0.46 - 1.05)    | 0.088   |
| <b>Coexisting conditions __ no (%)</b> |                       |         |
| Hypertension                           | 1.00 (0.90 - 1.10)    | 0.980   |
| Diabetes                               | 0.96 (0.88 - 1.04)    | 0.313   |
| Cerebrovascular disease                | 1.37 (1.20 -1.56)     | 0.001   |
| Chronic pulmonary disease              | 1.81 (1.68 - 1.97)    | 0.001   |
| Connective tissue disease              | 1.11 (0.98 - 1.27)    | 0.098   |
| Peptic ulcer disease                   | 0.77 (0.68 - 0.86)    | 0.001   |
| Liver disease                          | 0.72 (0.49 - 1.06)    | 0.101   |
| Cancer                                 | 1.41 (1.15 - 1.74)    | 0.001   |

**Table S4.** Adjusted odds ratios of mortality at 28 days for patients with acute kidney injury and RRT

| Independent variable            | OR C.I (95%)       | P value |
|---------------------------------|--------------------|---------|
| AKI with RRT                    | 3.65 (3.21 - 4.02) | 0.001   |
| Male sex                        | 1.15 (1.10 - 1.19) | 0.001   |
| Age group -----no. (%)          |                    |         |
| 40-49 yr.                       | 1.26 (1.09 - 1.46) | 0.001   |
| 50-59 yr.                       | 1.54 (1.37 - 1.73) | 0.001   |
| 60-69 yr.                       | 2.28 (2.04 - 2.55) | 0.001   |
| 70-79 yr.                       | 3.73 (3.34 - 4.16) | 0.001   |
| >= 80 yr.                       | 7.57 (6.79 - 8.45) | 0.001   |
| ICU admission                   |                    |         |
| Trauma                          | 1.07 (0.99 - 1.16) | 0.075   |
| Sepsis                          | 2.22(2.08 - 2.37)  | 0.001   |
| Myocardial infarction           | 1.05 (1.03 - 1.11) | 0.002   |
| Congestive heart failure        | 1.94 (1.76 - 2.14) | 0.001   |
| Contrast medium                 | 2.78 (2.7 - 3.40)  | 0.001   |
| Coexisting conditions __ no (%) |                    |         |
| Hypertension                    | 1.17 (1.09 - 1.25) | 0.001   |
| Diabetes                        | 1.17 (1.12 - 1.22) | 0.001   |
| Cerebrovascular disease         | 1.47 (1.37 -1.58)  | 0.001   |
| Chronic pulmonary disease       | 1.19 (1.14 - 1.25) | 0.001   |
| Connective tissue disease       | 1.01 (0.94 - 1.09) | 0.763   |
| Peptic ulcer disease            | 0.91 (0.85 - 0.97) | 0.006   |
| Liver disease                   | 2.73 (2.35 - 3.20) | 0.001   |
| Cancer                          | 2.64 (2.37 -2.93)  | 0.001   |
| pneumonia                       | 1.60 (1.47 -1.75)  | 0.001   |

**Table S5:** Baseline covariates

| <b>Eligibility identifiers</b>                   |                                                |                      |                                                                                                                     |
|--------------------------------------------------|------------------------------------------------|----------------------|---------------------------------------------------------------------------------------------------------------------|
| <b>Covariate</b>                                 | <b>Variable Name</b>                           | <b>Variable Type</b> | <b>Coding</b>                                                                                                       |
| Participant ID                                   | id                                             | Numerical            | Unique numerical identifier                                                                                         |
| Start of time interval                           | Date ICU admission                             | Continuous           | Date ICU admission                                                                                                  |
| End of time interval                             | 28 days after ICU admission                    | Continuous           | End of time interval                                                                                                |
| Age                                              | age                                            | Continuous           | Years                                                                                                               |
|                                                  | age_cat                                        | Categorical          | 1: 18 – 39 years<br>2: 40 – 49 years<br>3: 50 – 59 years<br>4: 60 – 69 years<br>5: 70 – 79 years<br>6: > = 80 years |
| Sex assigned at birth                            | sex                                            | Binary               | 0 : Female 1: Male                                                                                                  |
| <b>Coexisting diseases</b>                       |                                                |                      |                                                                                                                     |
| Hypertension                                     | Hypertension before ICU admission              | Binary               | 0: No 1: Yes                                                                                                        |
| Diabetes                                         | Diabetes before ICU admission                  | Binary               | 0: No 1: Yes                                                                                                        |
| Cerebrovascular disease                          | Cerebrovascular disease before ICU admission   | Binary               | 0: No 1: Yes                                                                                                        |
| Chronic pulmonary disease                        | Chronic pulmonary disease before ICU admission | Binary               | 0: No 1: Yes                                                                                                        |
| Connective tissue disease                        | Connective tissue disease before ICU admission | Binary               | 0: No 1: Yes                                                                                                        |
| Peptic ulcer disease                             | Peptic ulcer disease before ICU admission      | Binary               | 0: No 1: Yes                                                                                                        |
| Liver disease                                    | Liver disease before ICU admission             | Binary               | 0: No 1: Yes                                                                                                        |
| Cancer                                           | Cancer before ICU admission                    | Binary               | 0: No 1: Yes                                                                                                        |
| <b>ICU admission</b>                             |                                                |                      |                                                                                                                     |
| Trauma                                           | Trauma on ICU admission                        | Binary               | 0: No 1: Yes                                                                                                        |
| Sepsis                                           | Sepsis on ICU admission                        | Binary               | 0: No 1: Yes                                                                                                        |
| Myocardial infarction                            | Myocardial infarction on ICU admission         | Binary               | 0: No 1: Yes                                                                                                        |
| Contrast medium                                  | Contrast medium ` on ICU                       | Binary               | 0: No 1: Yes                                                                                                        |
| <b>Treatment variable</b>                        |                                                |                      |                                                                                                                     |
| nonsteroidal anti-inflammatory                   | NSAIDs                                         | Binary               | 0: No use 1: Yes use                                                                                                |
| <b>Outcomes variables</b>                        |                                                |                      |                                                                                                                     |
| Acute kidney injury with Replace Renal Treatment | AKI with RRT                                   | Binary               | 0: No : 1: Yes                                                                                                      |
| Pneumonia                                        | Pneumonia                                      | Binary               | 0: No : 1: Yes                                                                                                      |
| Mortality                                        | 28 day mortality                               | Binary               | 0: No : 1: Yes                                                                                                      |

**Figure S1.** Graphical Abstract

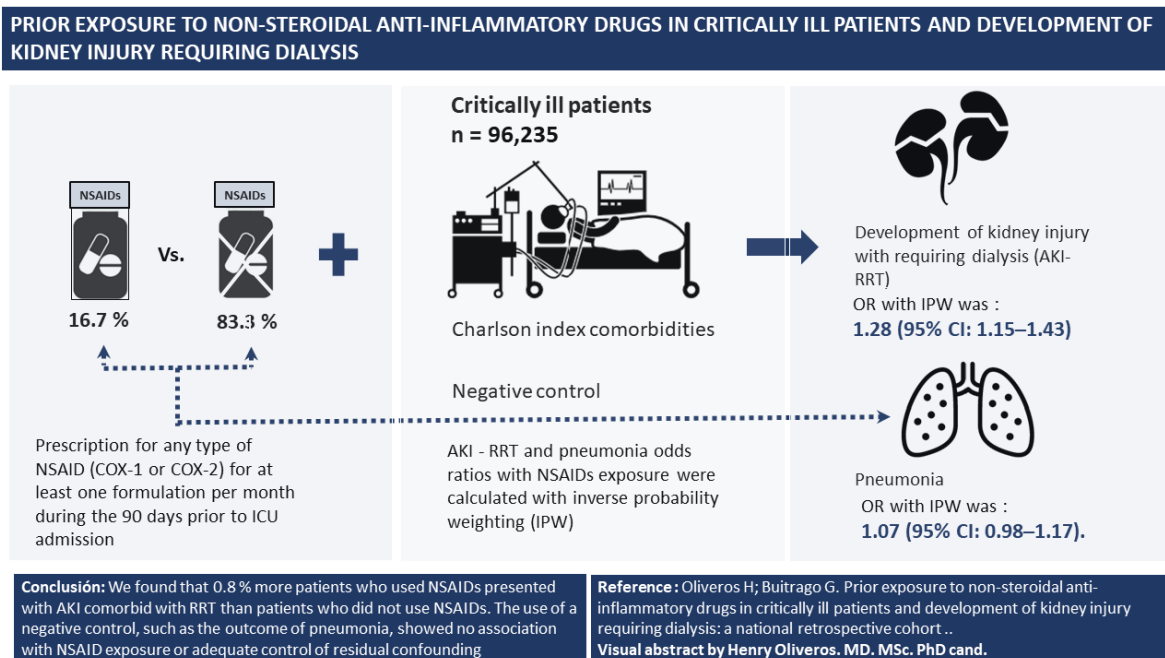

**Figure S2.** Distributions of the propensity index for users and non-users of NSAIDs.

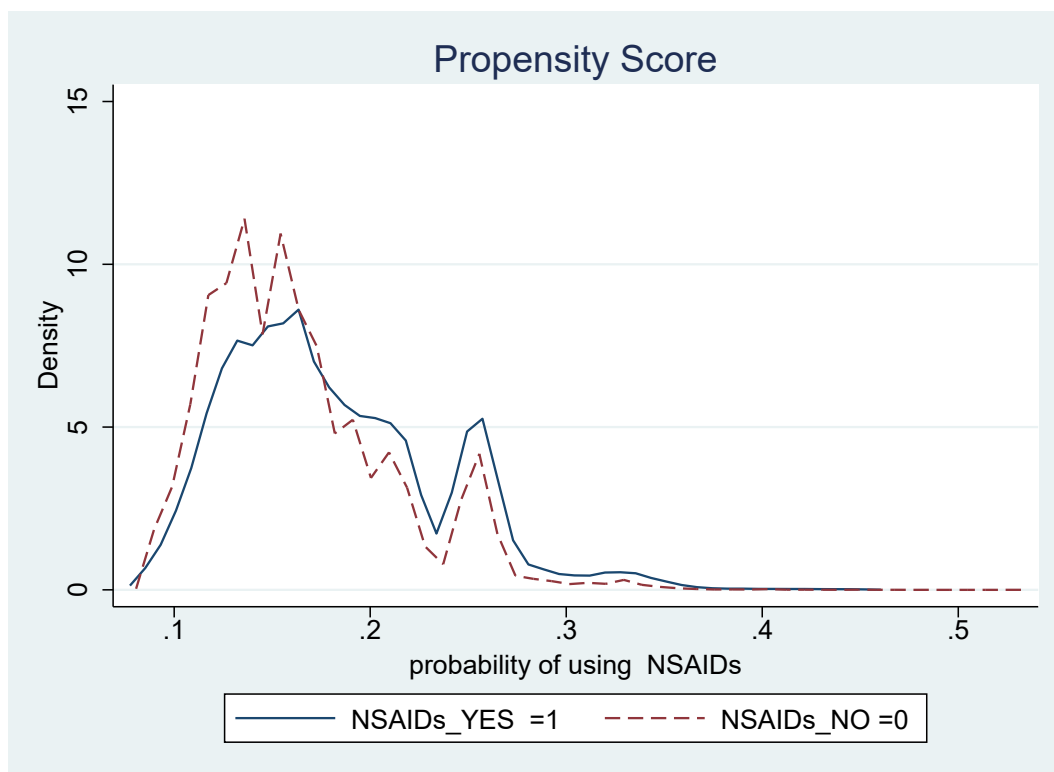



**Figure S3.** Factors for the development of mortality at 28 days

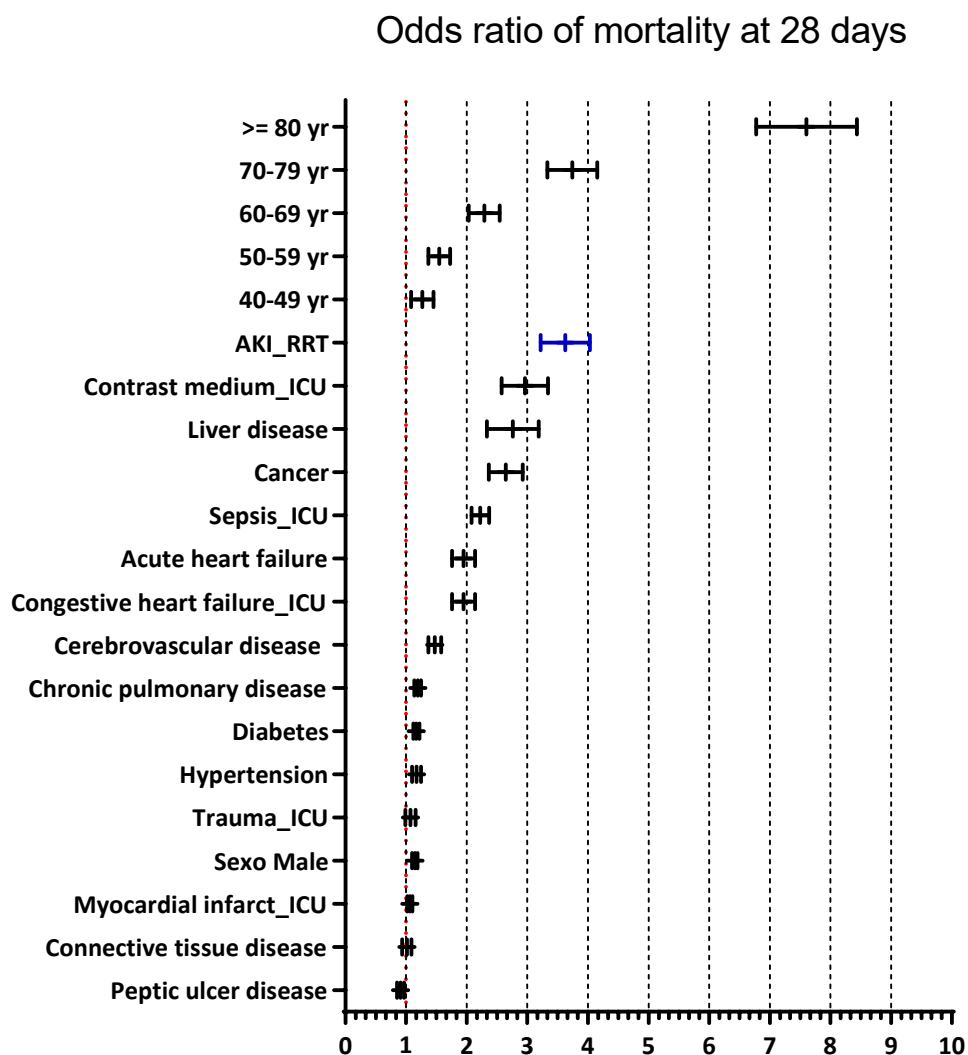

**Figure S4.** Comparative odds ratios between AKI and pneumonia associated with exposure to NSAIDs

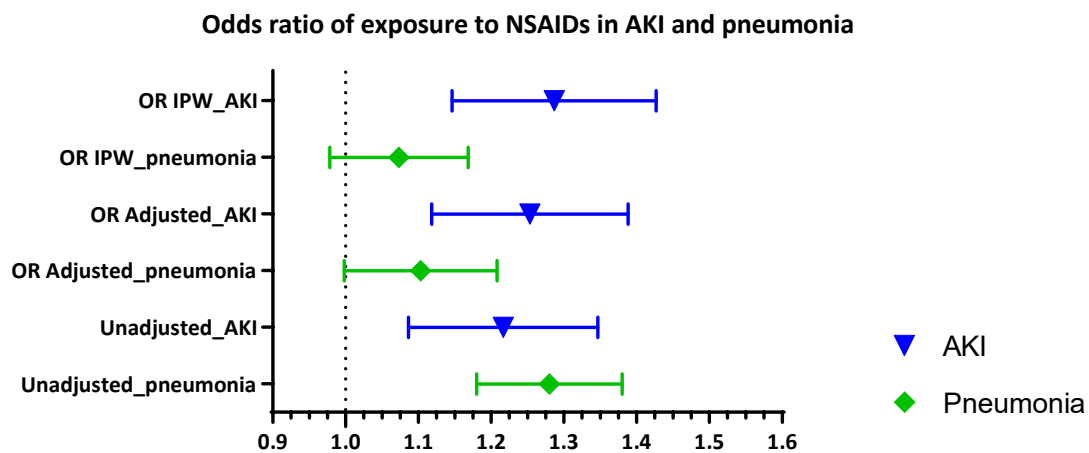

*Adjusted by : Age, sex, trauma, sepsis, myocardial infarct, congestive heart failure, contrast medium, hypertension, diabetes, cerebrovascular disease, chronic pulmonary disease, peptic ulcer disease, liver disease, cancer.*
